# Supplementary material for: Safety and Immunogenicity of Heterologous and Homologous 2-Dose Regimens of Adenovirus Serotype 26– and Modified Vaccinia Ankara–Vectored Ebola Vaccines: A Randomized, Controlled Phase 1 Study
Source: PubMed Central journal article supplement — J Infect Dis. 2020 Sep 16;226(4):595–607. doi: 10.1093/infdis/jiaa586 (PMC9441209; doi:10.1093/infdis/jiaa586), 2020-09-16
Supplement: jiaa586_suppl_supplementary_figure_1.pdf [file jiaa586_suppl_supplementary_figure_1.pdf]

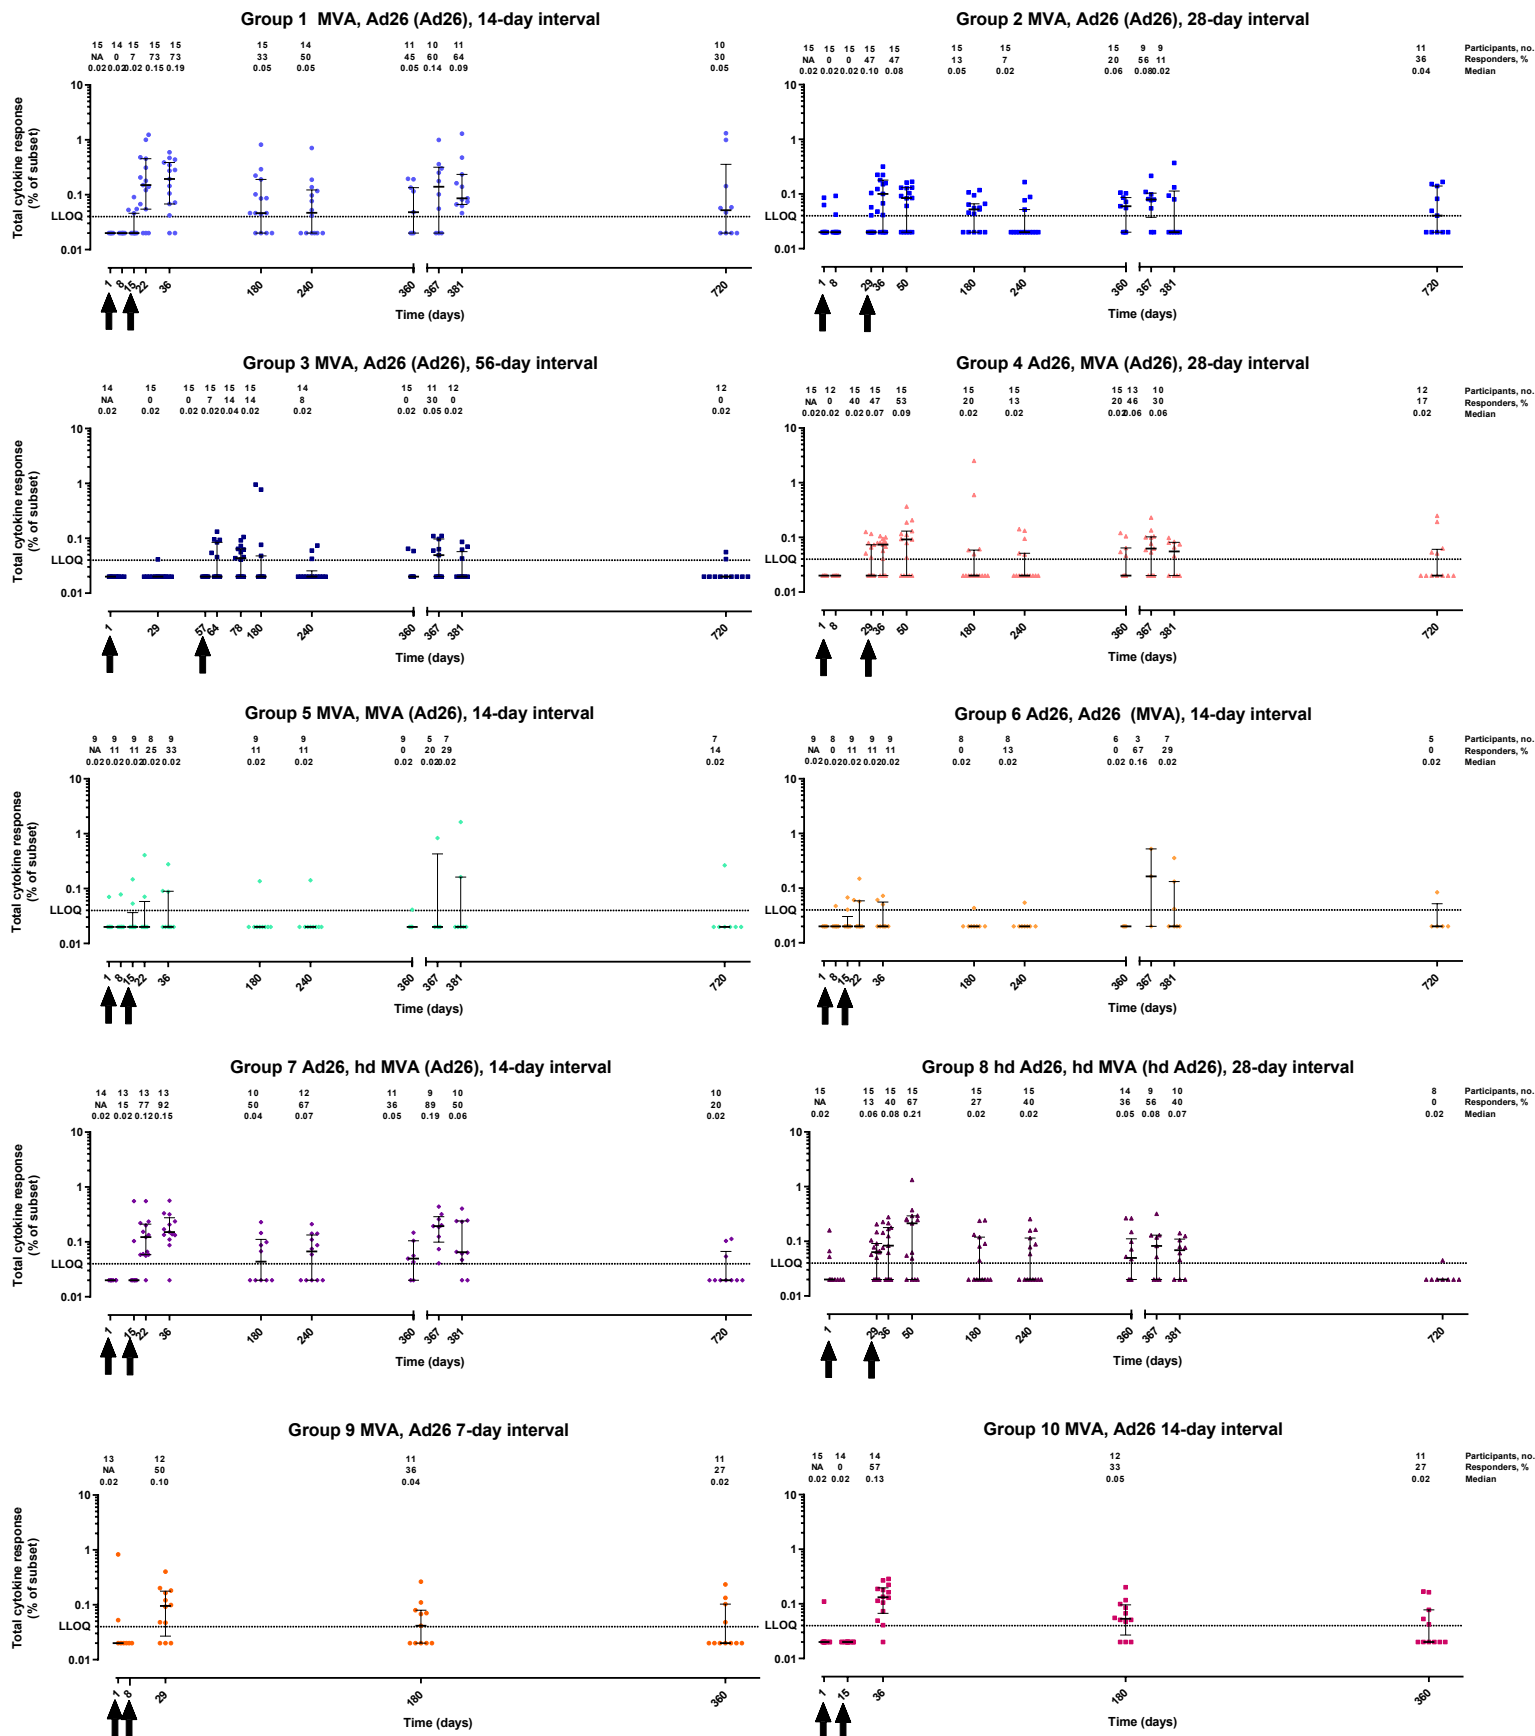

The lower limit of quantification (LLOQ) for intracellular cytokine staining (ICS) was 0.04%. Values below the LLOQ were imputed with 0.02% (LLOQ/2).

**Supplementary Figure 1:** Median CD4<sup>+</sup> cytokine responses (ICS) following heterologous or homologous two-dose vaccination with Ad26 and/or MVA and booster vaccination at Day 360 for Groups 1-8 and Groups 9 and 10 (no booster vaccinations). Vaccination regimen and interval shown as [Group number] dose 1/dose 2 (booster) followed by day of each dose.
